# Supplementary material for: Unveiling aerosol–cloud interactions – Part 2: Minimising the effects of aerosol swelling and wet scavenging in ECHAM6-HAM2 for comparison to satellite data
Source: Copernicus journal article supplement (doi:10.5194/acp-17-13165-2017), 2017-11-07
Supplement: Supplementary file [file acp-17-13165-2017-supplement-title-page.pdf › acp-17-13165-2017-supplement-title-page.pdf]

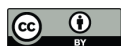

## *Supplement of*

# **Unveiling aerosol–cloud interactions – Part 2: Minimising the effects of aerosol swelling and wet scavenging in ECHAM6-HAM2 for comparison to satellite data**

**David Neubauer et al.**

*Correspondence to:* David Neubauer ([david.neubauer@env.ethz.ch](mailto:david.neubauer@env.ethz.ch))

- [acp-17-13165-2017-supplement-title-page.pdf](#)
- [fig03.csv](#)
- [fig04.csv](#)
- [fig05.csv](#)
- [fig06.csv](#)
- [fig08.csv](#)
- [fig09.csv](#)

The copyright of individual parts of the supplement might differ from the CC BY 3.0 License.
